# Supplementary material
Source: PubMed Central journal article supplement (PMC6338315)
Supplement: jciinsight-3-123673-s022.pdf [file jciinsight-3-123673-s022.pdf]

## Supplementary Data

| Metallothionein Family    |                                                           |       |          |                      |
|---------------------------|-----------------------------------------------------------|-------|----------|----------------------|
| Gene                      | Gene Name                                                 | logFC | P. Value | False Discovery Rate |
| MT1G                      | Metallothionein 1G                                        | 2.62  | 1.19E-10 | 4.66E-08             |
| MT1H                      | Metallothionein 1H                                        | 2.58  | 4.87E-08 | 7.12E-06             |
| MT1M                      | Metallothionein 1M                                        | 2.23  | 1.18E-07 | 1.44E-05             |
| MT1X                      | Metallothionein 1X                                        | 2.21  | 2.64E-11 | 1.25E-08             |
| MT2A                      | Metallothionein 2A                                        | 1.82  | 1.38E-12 | 1.26E-09             |
| MT1E                      | Metallothionein 1E                                        | 1.51  | 2.41E-11 | 1.18E-08             |
| MT1F                      | Metallothionein 1F                                        | 1.47  | 1.85E-09 | 4.09E-07             |
| Unfolded Protein Response |                                                           |       |          |                      |
| Gene                      | Gene Name                                                 | logFC | P. Value | False Discovery Rate |
| AMFR                      | autocrine motility factor receptor                        | -0.20 | 9.94E-01 | 1.00                 |
| ASK1                      | mitogen-activated protein kinase kinase kinase 5          | 0.27  | 8.11E-01 | 1.00                 |
| ATF4                      | activating transcription factor 4                         | 0.22  | 9.67E-01 | 1.00                 |
| ATF6                      | activating transcription factor 6                         | 0.01  | 1.00     | 1.00                 |
| BCL2                      | BCL2, apoptosis regulator                                 | -0.43 | 4.80E-02 | 4.24E-01             |
| BIP                       | heat shock protein family A (Hsp70) member 5              | 0.13  | 1.00     | 1.00                 |
| CALR                      | calreticulin                                              | 0.12  | 1.00     | 1.00                 |
| CANX                      | calnexin                                                  | 0.12  | 1.00     | 1.00                 |
| CHOP                      | DNA damage inducible transcript 3                         | 0.25  | 7.99E-01 | 1.00                 |
| EDEM                      | ER degradation enhancing alpha-mannosidase like protein 1 | 0.37  | 1.88E-01 | 1.00                 |
| EIFA                      | eukaryotic translation initiation factor 2A               | 0.06  | 1.00     | 1.00                 |
| ERO1LB                    | endoplasmic reticulum oxidoreductase 1 beta               | -0.29 | 5.69E-01 | 1.00                 |
| GADD34                    | protein phosphatase 1 regulatory subunit 15A              | 1.18  | 3.66E-11 | 1.62E-08             |
| GRP94                     | heat shock protein 90 beta family member 1                | 0.16  | 9.98E-01 | 1.00                 |
| HSPH1                     | heat shock protein family H (Hsp110) member 1             | 0.62  | 9.70E-06 | 5.12E-04             |
| INSIG1                    | insulin induced gene 1                                    | 1.69  | 8.47E-18 | 3.88E-14             |
| IRE1                      | endoplasmic reticulum to nucleus signaling 1              | 0.26  | 8.13E-01 | 1.00                 |
| JNK1                      | mitogen-activated protein kinase 8                        | -0.08 | 1.00     | 1.00                 |
| KAI1                      | CD82 molecule                                             | 0.60  | 8.87E-04 | 1.90E-02             |
| MKK7                      | mitogen-activated protein kinase kinase 7                 | -0.08 | 1.00     | 1.00                 |
| NRF2                      | nuclear factor, erythroid 2 like 2                        | -0.03 | 1.00     | 1.00                 |
| OS9                       | OS9, endoplasmic reticulum lectin                         | -0.08 | 1.00     | 1.00                 |
| P58IPK                    | DnaJ heat shock protein family (Hsp40) member C3          | 0.05  | 1.00     | 1.00                 |
| PERK                      | eukaryotic translation initiation factor 2 alpha kinase 3 | 0.11  | 1.00     | 1.00                 |
| PPARY                     | peroxisome proliferator activated receptor gamma          | 0.19  | 9.57E-01 | 1.00                 |
| SCAP                      | SREBF chaperone                                           | -0.04 | 1.00     | 1.00                 |
| SEL1L                     | SEL1L ERAD E3 ligase adaptor subunit                      | -0.12 | 1.00     | 1.00                 |
| SYVN1                     | synoviolin 1                                              | 0.07  | 1.00     | 1.00                 |
| TRAF2                     | TNF receptor associated factor 2                          | 0.26  | 7.99E-01 | 1.00                 |
| UBX                       | UBX domain protein 4                                      | -0.12 | 1.00     | 1.00                 |

| VCP                                            | valosin containing protein                                      | 0.22  | 9.97E-01 | 1.00                 |
|------------------------------------------------|-----------------------------------------------------------------|-------|----------|----------------------|
| XBP1                                           | X-box binding protein 1                                         | 0.26  | 9.19E-01 | 1.00                 |
| <b>NRF2-mediated Oxidative Stress Response</b> |                                                                 |       |          |                      |
| Gene                                           | Gene Name                                                       | logFC | P. Value | False Discovery Rate |
| AKR                                            | aldo-keto reductase family 1 member A1                          | 0.09  | 1.00     | 1.0                  |
| AKT                                            | AKT serine/threonine kinase 1                                   | 0.23  | 9.91E-01 | 1.0                  |
| AOX1                                           | aldehyde oxidase 1                                              | 0.32  | 5.17E-01 | 1.0                  |
| ASK1                                           | mitogen-activated protein kinase kinase kinase 5                | 0.27  | 8.11E-01 | 1.0                  |
| ATF4                                           | activating transcription factor 4                               | 0.22  | 9.67E-01 | 1.0                  |
| BACH1                                          | BTB domain and CNC homolog 1                                    | 0.05  | 1.00     | 1.0                  |
| cFos                                           | Fos proto-oncogene, AP-1 transcription factor subunit           | 1.12  | 2.10E-04 | 6.04E-03             |
| cMAF                                           | MAF bZIP transcription factor                                   | -0.61 | 1.42E-02 | 1.68E-01             |
| cRaf                                           | Raf-1 proto-oncogene, serine/threonine kinase                   | 0.04  | 1.00     | 1.0                  |
| CAT                                            | catalase                                                        | -0.38 | 2.13E-01 | 1.0                  |
| CBR1                                           | carbonyl reductase 1                                            | -0.08 | 1.00     | 1.0                  |
| CCT7                                           | chaperonin containing TCP1 subunit 7                            | 0.30  | 6.54E-01 | 1.0                  |
| CLPP                                           | caseinolytic mitochondrial matrix peptidase proteolytic subunit | 0.15  | 9.90E-01 | 1.0                  |
| CUL3                                           | cullin 3                                                        | -0.04 | 1.00     | 1.0                  |
| EPHX1                                          | epoxide hydrolase 1                                             | -0.29 | 6.84E-01 | 1.0                  |
| ERK5                                           | mitogen-activated protein kinase 7                              | 0.03  | 1.00     | 1.0                  |
| ERP29                                          | endoplasmic reticulum protein 29                                | 0.02  | 1.00     | 1.0                  |
| FKBP5                                          | FK506 binding protein 5                                         | -0.06 | 9.96E-01 | 1.0                  |
| FRA1                                           | FOS like 1, AP-1 transcription factor subunit                   | 0.90  | 3.16E-05 | 1.35E-03             |
| FTH1                                           | ferritin heavy chain 1                                          | 0.32  | 5.06E-01 | 1.0                  |
| FTL                                            | ferritin light chain                                            | -0.25 | 8.51E-01 | 1.0                  |
| GCLC                                           | glutamate-cysteine ligase catalytic subunit                     | 0.13  | 1.00     | 1.0                  |
| GCLM                                           | glutamate-cysteine ligase modifier subunit                      | 0.21  | 9.59E-01 | 1.0                  |
| GSK3B                                          | glycogen synthase kinase 3 beta                                 | 0.24  | 9.78E-01 | 1.0                  |
| GSR                                            | glutathione-disulfide reductase                                 | 0.07  | 1.00     | 1.0                  |
| HERPUD1                                        | homocysteine inducible ER protein with ubiquitin like domain 1  | 0.02  | 1.00     | 1.0                  |
| HIP2                                           | ubiquitin conjugating enzyme E2 K                               | 0.03  | 1.00     | 1.0                  |
| HMOX1                                          | heme oxygenase 1                                                | 1.31  | 1.81E-18 | 1.82E-14             |
| Jun                                            | Jun proto-oncogene, AP-1 transcription factor subunit           | 0.71  | 4.12E-08 | 6.21E-06             |
| KEAP1                                          | kelch like ECH associated protein 1                             | 0.09  | 1.00     | 1.0                  |
| MEK5                                           | mitogen-activated protein kinase kinase 5                       | -0.33 | 4.80E-01 | 1.0                  |
| MEKK                                           | mitogen-activated protein kinase kinase kinase 1                | -0.25 | 9.52E-01 | 1.0                  |
| MRP1                                           | ATP binding cassette subfamily C member 1                       | -0.18 | 1.00     | 1.0                  |
| MRP2                                           | ATP binding cassette subfamily C member 2                       | 0.25  | 6.32E-01 | 1.0                  |
| MRP4                                           | ATP binding cassette subfamily C member 4                       | -0.27 | 8.92E-01 | 1.0                  |
| NRF2                                           | nuclear factor, erythroid 2 like 2                              | -0.03 | 1.00     | 1.0                  |
| NRPB                                           | ectodermal-neural cortex 1                                      | 0.42  | 1.32E-01 | 8.70E-01             |
| p38MAPK                                        | mitogen-activated protein kinase 14                             | 0.08  | 1.00     | 1.0                  |
| PERK                                           | eukaryotic translation initiation factor 2 alpha kinase 3       | 0.11  | 1.00     | 1.0                  |

| PMF1                                            | polyamine modulated factor 1                                                  | -0.46  | 2.92E-01 | 1.0                  |
|-------------------------------------------------|-------------------------------------------------------------------------------|--------|----------|----------------------|
| PPIB                                            | peptidylprolyl isomerase B                                                    | 0.22   | 9.73E-01 | 1.0                  |
| PRDX1                                           | peroxiredoxin 1                                                               | 0.51   | 6.38E-04 | 1.46E-02             |
| PTPLAD1                                         | 3-hydroxyacyl-CoA dehydratase 3                                               | 0.00   | 1.00     | 1.0                  |
| Roc1                                            | ring-box 1                                                                    | 0.09   | 9.96E-01 | 1.0                  |
| SQSTM1                                          | sequestosome 1                                                                | 0.51   | 3.77E-04 | 9.77E-03             |
| SRBI                                            | scavenger receptor class B member 1                                           | 0.23   | 8.23E-01 | 1.0                  |
| STIP1                                           | stress induced phosphoprotein 1                                               | 0.40   | 7.80E-02 | 6.08E-01             |
| TAK1                                            | mitogen-activated protein kinase kinase kinase 7                              | -0.11  | 1.00     | 1.0                  |
| TRXR1                                           | thioredoxin reductase 1                                                       | 0.73   | 2.90E-09 | 5.94E-07             |
| TXN                                             | thioredoxin                                                                   | 0.54   | 1.16E-03 | 2.37E-02             |
| UB2R1                                           | cell division cycle 34                                                        | 0.11   | 1.00     | 1.0                  |
| UBB                                             | ubiquitin B                                                                   | 0.25   | 9.51E-01 | 1.0                  |
| UbcM2                                           | ubiquitin conjugating enzyme E2 E3                                            | -0.09  | 1.00     | 1.0                  |
| UGT                                             | solute carrier family 35 member A2                                            | 0.19   | 9.58E-01 | 1.0                  |
| USP14                                           | ubiquitin specific peptidase 14                                               | 0.30   | 6.39E-01 | 1.0                  |
| VCP                                             | valosin containing protein                                                    | 0.22   | 9.97E-01 | 1.0                  |
| <b>Superpathway of Cholesterol Biosynthesis</b> |                                                                               |        |          |                      |
| Gene                                            | Gene Name                                                                     | logFC  | P. Value | False Discovery Rate |
| ABCA1                                           | ATP binding cassette subfamily A member 1                                     | -0.71  | 1.92E-04 | 5.7E-03              |
| ACAT1                                           | acetyl-CoA acetyltransferase 1                                                | -0.265 | 8.04E-01 | 1.0                  |
| ACAT2                                           | acetyl-CoA acetyltransferase 2                                                | 1.08   | 3.06E-11 | 1E-08                |
| CYP51A1                                         | cytochrome P450 family 51 subfamily A member 1                                | 0.86   | 2.92E-12 | 2E-09                |
| DHCR7                                           | 7-dehydrocholesterol reductase                                                | 0.94   | 6.29E-10 | 2E-07                |
| DHCR24                                          | 24-dehydrocholesterol reductase                                               | 0.456  | 1.00E-02 | 1E-01                |
| EBP                                             | emopamil binding protein (sterol isomerase)                                   | 0.96   | 1.92E-09 | 4E-07                |
| FDFT1                                           | farnesyl-diphosphate farnesyltransferase 1                                    | 0.93   | 9.9E-13  | 1E-09                |
| FDPS                                            | farnesyl diphosphate synthase                                                 | 1.14   | 2.16E-13 | 2E-10                |
| GGPS1                                           | geranylgeranyl diphosphate synthase 1                                         | -0.021 | 1.0      | 1.0                  |
| HADHA                                           | hydroxyacyl-CoA dehydrogenase trifunctional multienzyme complex subunit alpha | -0.019 | 1.0      | 1.0                  |
| HADHB                                           | hydroxyacyl-CoA dehydrogenase trifunctional multienzyme complex subunit beta  | -0.203 | 9.89E-01 | 1.0                  |
| HMGCR                                           | 3-hydroxy-3-methylglutaryl-CoA reductase                                      | 0.88   | 6.6E-12  | 4E-09                |
| HMGCS1                                          | 3-hydroxy-3-methylglutaryl-CoA synthase 1                                     | 1.48   | 2.65E-18 | 2E-14                |
| HSD17B7                                         | hydroxysteroid 17-beta dehydrogenase 7                                        | 0.62   | 0.000279 | 8E-03                |
| IDI1                                            | isopentenyl-diphosphate delta isomerase 1                                     | 1.07   | 1.65E-12 | 1E-09                |
| LBR                                             | lamin B receptor                                                              | -0.154 | 9.96E-01 | 1.0                  |
| LSS                                             | lanosterol synthase                                                           | 0.60   | 8.02E-06 | 4E-04                |
| MSMO1                                           | methylsterol monooxygenase 1                                                  | 1.24   | 2.39E-15 | 5E-12                |
| MVD                                             | mevalonate diphosphate decarboxylase                                          | 1.18   | 7.85E-11 | 3E-08                |
| MVK                                             | mevalonate kinase                                                             | 0.252  | 8.18E-01 | 1.0                  |
| NSDHL                                           | NAD(P) dependent steroid dehydrogenase-like                                   | 0.79   | 3.03E-06 | 2E-04                |
| PMVK                                            | phosphomevalonate kinase                                                      | 0.291  | 6.52E-01 | 1.0                  |
| SC5D                                            | sterol-C5-desaturase                                                          | 0.50   | 0.00187  | 3E-02                |

|        |                                      |       |          |       |
|--------|--------------------------------------|-------|----------|-------|
| SQLE   | squalene epoxidase                   | 0.93  | 2.07E-11 | 1E-08 |
| TM7SF2 | transmembrane 7 superfamily member 2 | 0.175 | 9.75E-01 | 1.0   |

Supplemental Table I. Global transcriptional response to PMB exposure, relative to control, results in significant induction of injury response genes. The following genes (blue shaded) were significantly different when cells were exposed to 50  $\mu$ M PMB, relative to control, as indicated by log<sub>2</sub>-Fold Change (logFC) between the two treatment groups being compared, *P* value, and False Discovery Rate (FDR) which was the p-value adjusted for multiple testing (Benjamini & Hochberg's method). Specific pathways of interest included the metallothionein family, unfolded protein response, NRF2-mediated Oxidative Stress Response, and Superpathway of Cholesterol Biosynthesis. The following genes (yellow shaded) are recognized genes that are associated with the NRF2 Antioxidant Response.

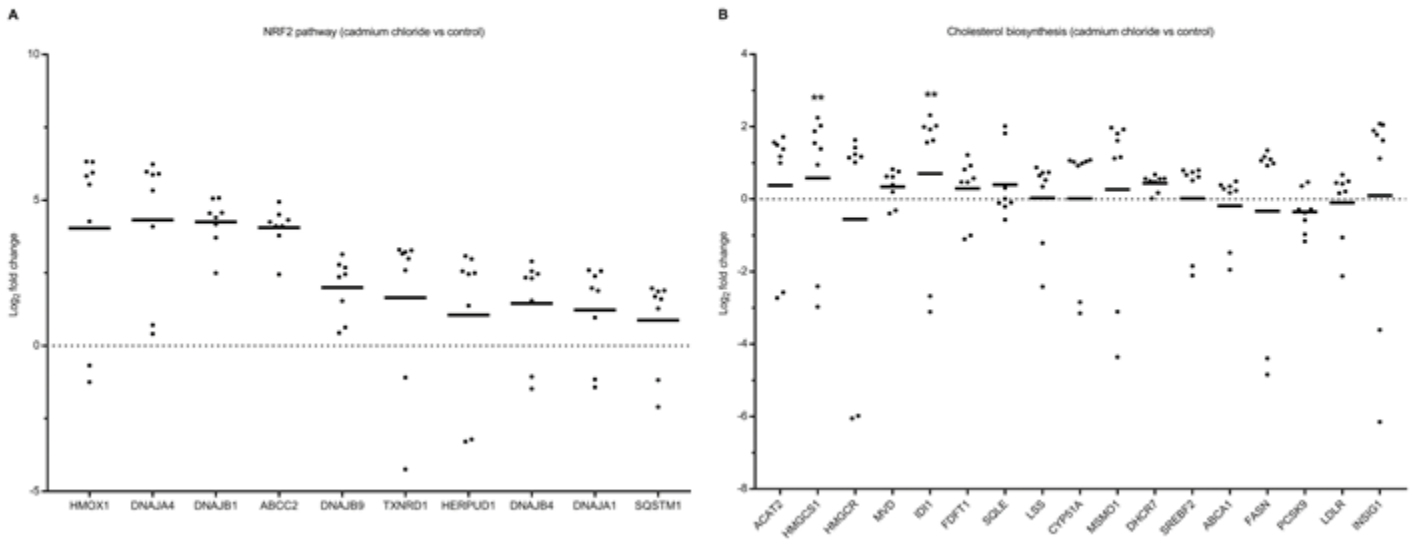

Supplemental Figure 1. RNAseq analysis of cadmium-treated MPS. Cadmium chloride exposure (25  $\mu$ M/48 hours) resulted in mRNA induction of genes in the NRF2 pathway (A) but no changes in genes associated with cholesterol biosynthesis (B) (\*no significant change relative to control MPS).
